# Supplementary material for: Performance Analysis of Non-Interferometry Based Surface Plasmon Resonance Microscopes
Source: MDPI journal article supplement (doi:10.3390/s21155230), 2021-08-02
Supplement: s1 [file s1]

### Supplementary material

The convergence curves showing the stability in the zeroth-order reflectance as a function of the number of diffracted orders are shown in Figure S1 and Figure S2. The two figures show all the marginal cases and polarization directions in this study, including:

Figure S1a:  $\lambda=633\text{nm}$ ,  $\lambda_g=1\mu\text{m}$ ,  $\theta_0=0\text{ rad}$ ,  $\phi=0\text{ rad}$  and  $\psi=0\text{ rad}$

Figure S1b:  $\lambda=633\text{nm}$ ,  $\lambda_g=25\mu\text{m}$ ,  $\theta_0=0\text{ rad}$ ,  $\phi=0\text{ rad}$  and  $\psi=0\text{ rad}$

Figure S1c:  $\lambda=633\text{nm}$ ,  $\lambda_g=1\mu\text{m}$ ,  $\theta_0=0\text{ rad}$ ,  $\phi=0\text{ rad}$  and  $\psi=\pi/2\text{ rad}$

Figure S1d:  $\lambda=633\text{nm}$ ,  $\lambda_g=25\mu\text{m}$ ,  $\theta_0=0\text{ rad}$ ,  $\phi=0\text{ rad}$  and  $\psi=\pi/2\text{ rad}$

Figure S1e:  $\lambda=633\text{nm}$ ,  $\lambda_g=1\mu\text{m}$ ,  $\theta_0=0\text{ rad}$ ,  $\phi=\pi/2\text{ rad}$  and  $\psi=0\text{ rad}$

Figure S1f:  $\lambda=633\text{nm}$ ,  $\lambda_g=25\mu\text{m}$ ,  $\theta_0=0\text{ rad}$ ,  $\phi=\pi/2\text{ rad}$  and  $\psi=0\text{ rad}$

Figure S1g:  $\lambda=633\text{nm}$ ,  $\lambda_g=1\mu\text{m}$ ,  $\theta_0=0\text{ rad}$ ,  $\phi=\pi/2\text{ rad}$  and  $\psi=\pi/2\text{ rad}$

Figure S1h:  $\lambda=633\text{nm}$ ,  $\lambda_g=25\mu\text{m}$ ,  $\theta_0=0\text{ rad}$ ,  $\phi=\pi/2\text{ rad}$  and  $\psi=\pi/2\text{ rad}$

Figure S2a:  $\lambda=633\text{nm}$ ,  $\lambda_g=1\mu\text{m}$ ,  $\theta_0=1.45\text{ rad}$ ,  $\phi=0\text{ rad}$  and  $\psi=0\text{ rad}$

Figure S2b:  $\lambda=633\text{nm}$ ,  $\lambda_g=25\mu\text{m}$ ,  $\theta_0=1.45\text{ rad}$ ,  $\phi=0\text{ rad}$  and  $\psi=0\text{ rad}$

Figure S2c:  $\lambda=633\text{nm}$ ,  $\lambda_g=1\mu\text{m}$ ,  $\theta_0=1.45\text{ rad}$ ,  $\phi=0\text{ rad}$  and  $\psi=\pi/2\text{ rad}$

Figure S2d:  $\lambda=633\text{nm}$ ,  $\lambda_g=25\mu\text{m}$ ,  $\theta_0=1.45\text{ rad}$ ,  $\phi=0\text{ rad}$  and  $\psi=\pi/2\text{ rad}$

Figure S2e:  $\lambda=633\text{nm}$ ,  $\lambda_g=1\mu\text{m}$ ,  $\theta_0=1.45\text{ rad}$ ,  $\phi=\pi/2\text{ rad}$  and  $\psi=0\text{ rad}$

Figure S2f:  $\lambda=633\text{nm}$ ,  $\lambda_g=25\mu\text{m}$ ,  $\theta_0=1.45\text{ rad}$ ,  $\phi=\pi/2\text{ rad}$  and  $\psi=0\text{ rad}$

Figure S2g:  $\lambda=633\text{nm}$ ,  $\lambda_g=1\mu\text{m}$ ,  $\theta_0=1.45\text{ rad}$ ,  $\phi=\pi/2\text{ rad}$  and  $\psi=\pi/2\text{ rad}$

Figure S2h:  $\lambda=633\text{nm}$ ,  $\lambda_g=25\mu\text{m}$ ,  $\theta_0=1.45\text{ rad}$ ,  $\phi=\pi/2\text{ rad}$  and  $\psi=\pi/2\text{ rad}$

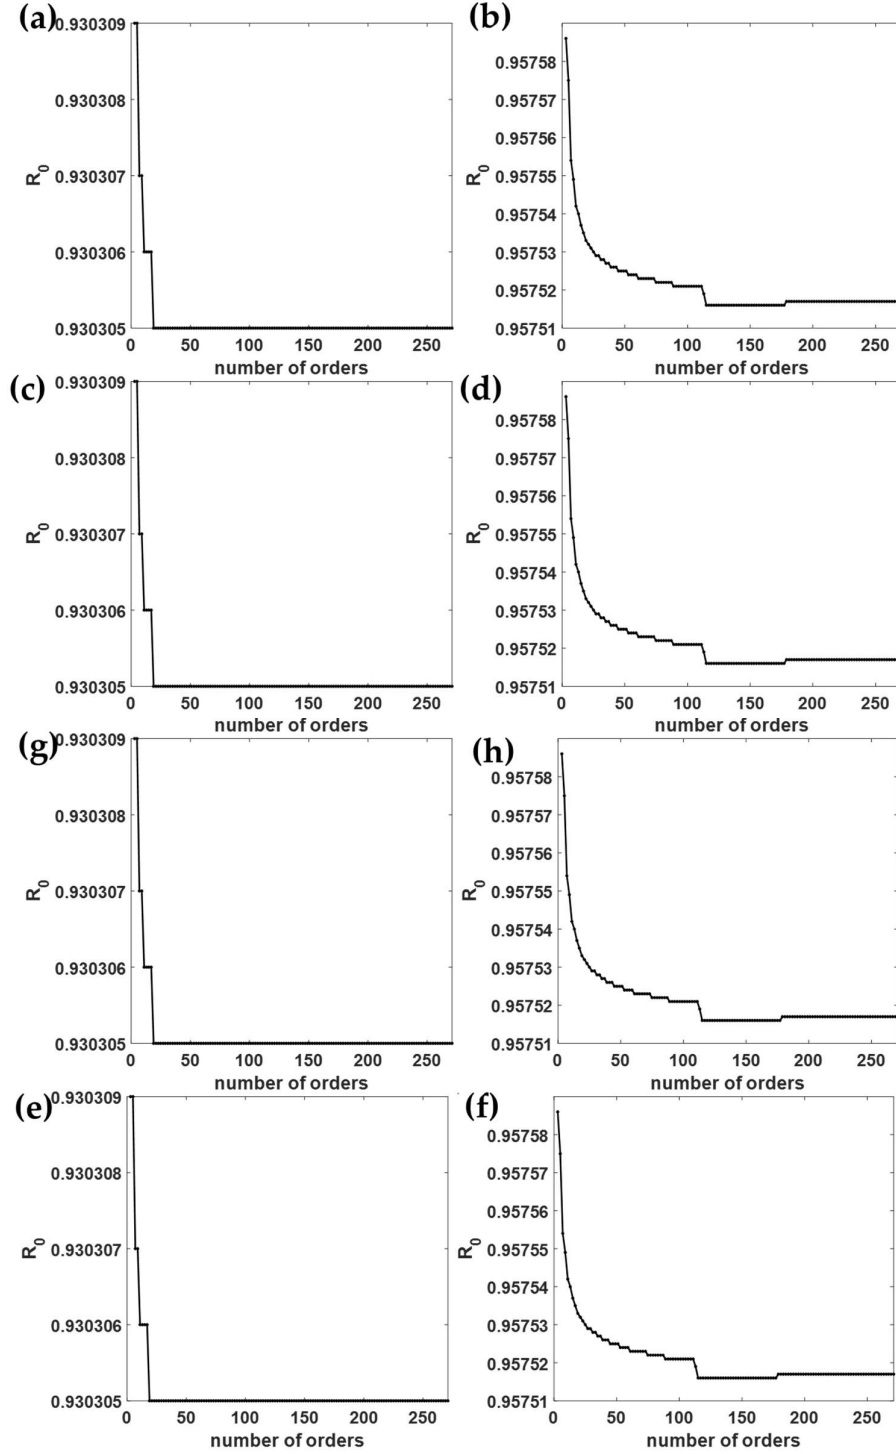

**Figure S1.** Shows RCWA simulation convergence tests using the incident wavelength  $\lambda$  of 633nm and (a)  $\lambda_g=1\mu\text{m}$ ,  $\theta_0=0$  rad,  $\phi=0$  rad and  $\psi=0$  rad, (b)  $\lambda_g=25\mu\text{m}$ ,  $\theta_0=0$  rad,  $\phi=0$  rad and  $\psi=0$  rad, (c)  $\lambda_g=1\mu\text{m}$ ,  $\theta_0=0$  rad,  $\phi=0$  rad and  $\psi=\pi/2$  rad, (d)  $\lambda_g=25\mu\text{m}$ ,  $\theta_0=0$  rad,  $\phi=0$  rad and  $\psi=\pi/2$  rad, (e)  $\lambda_g=1\mu\text{m}$ ,  $\theta_0=0$  rad,  $\phi=\pi/2$  rad and  $\psi=0$  rad, (f)  $\lambda_g=25\mu\text{m}$ ,  $\theta_0=0$  rad,  $\phi=\pi/2$  rad and  $\psi=0$  rad, (g)  $\lambda_g=1\mu\text{m}$ ,  $\theta_0=0$  rad,  $\phi=\pi/2$  rad and  $\psi=\pi/2$  rad, and (h)  $\lambda_g=25\mu\text{m}$ ,  $\theta_0=0$  rad,  $\phi=\pi/2$  rad and  $\psi=\pi/2$  rad

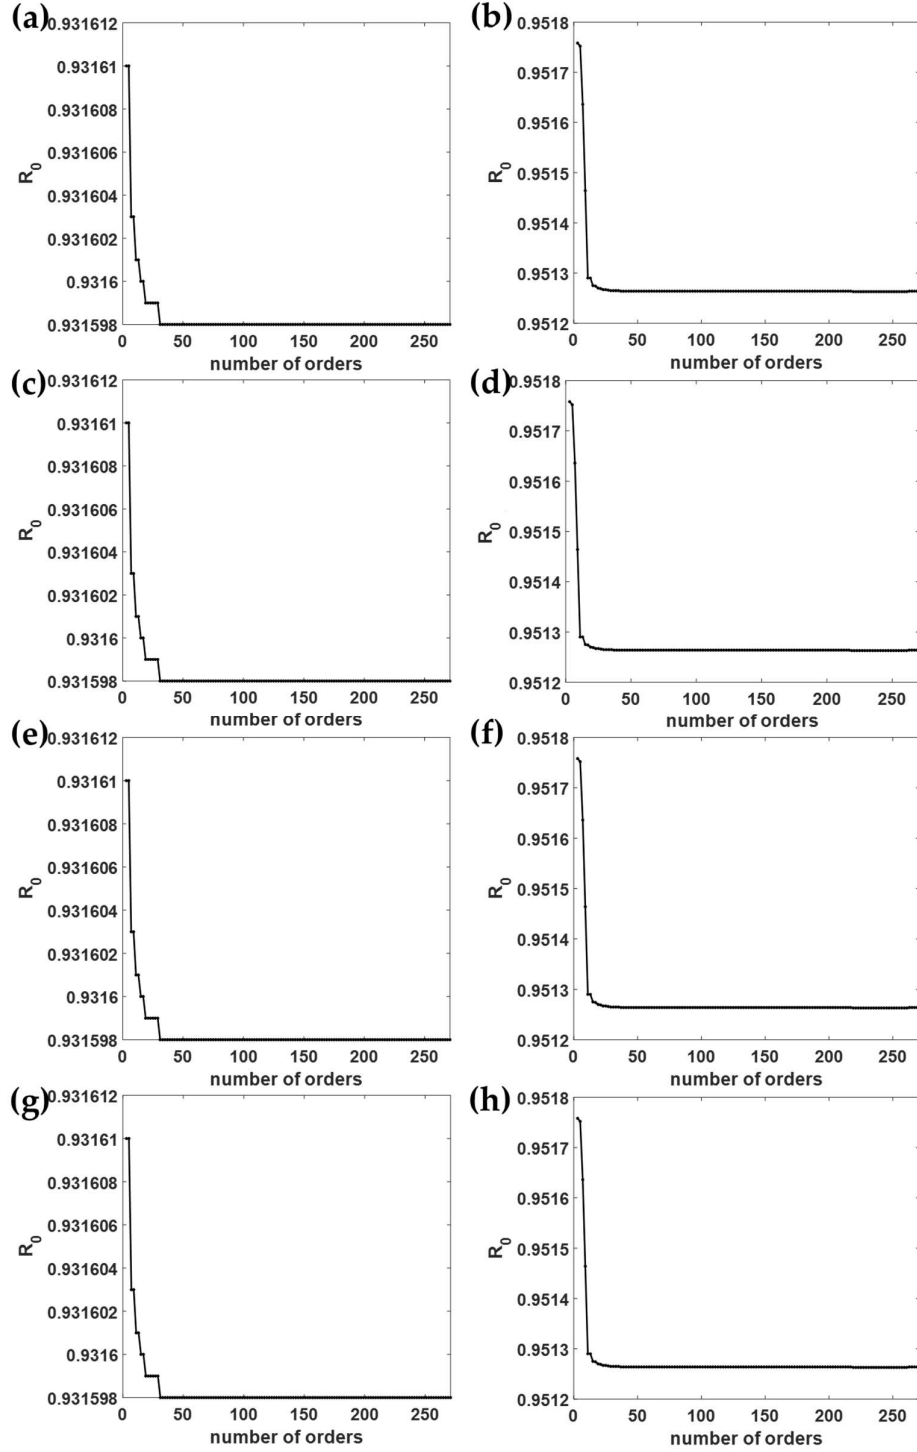

**Figure S2.** Shows RCWA simulation convergence tests using the incident wavelength  $\lambda$  of 633nm and (a)  $\lambda_g=1\mu\text{m}$ ,  $\theta_0=1.45$  rad,  $\phi=0$  rad and  $\psi=0$  rad, (b)  $\lambda_g=25\mu\text{m}$ ,  $\theta_0=1.45$  rad,  $\phi=0$  rad and  $\psi=0$  rad, (c)  $\lambda_g=1\mu\text{m}$ ,  $\theta_0=1.45$  rad,  $\phi=0$  rad and  $\psi=\pi/2$  rad, (d)  $\lambda_g=25\mu\text{m}$ ,  $\theta_0=1.45$  rad,  $\phi=0$  rad and  $\psi=\pi/2$  rad, (e)  $\lambda_g=1\mu\text{m}$ ,  $\theta_0=1.45$  rad,  $\phi=\pi/2$  rad and  $\psi=0$  rad, (f)  $\lambda_g=25\mu\text{m}$ ,  $\theta_0=1.45$  rad,  $\phi=\pi/2$  rad and  $\psi=0$  rad, (g)  $\lambda_g=1\mu\text{m}$ ,  $\theta_0=1.45$  rad,  $\phi=\pi/2$  rad and  $\psi=\pi/2$  rad, and (h)  $\lambda_g=25\mu\text{m}$ ,  $\theta_0=1.45$  rad,  $\phi=\pi/2$  rad and  $\psi=\pi/2$  rad

In conclusion, the 271 diffracted orders employed in the RCWA simulations can provide convergence for all the cases in the scope of the study.
